# Supplementary material for: Comorbidities in transplant recipients with acute myeloid leukemia receiving low-intensity conditioning regimens: an ALWP EBMT study
Source: PubMed Central journal article supplement — Blood Adv. 2023 Jan 10;7(10):2143–52. doi: 10.1182/bloodadvances.2022008656 (PMC10206431; doi:10.1182/bloodadvances.2022008656), 2023-01-10
Supplement: BLOODA_ADV-2022-008656-mmc1.pdf [file BLOODA_ADV-2022-008656-mmc1.pdf]

## Appendix 1: List of centers which contributed patients to this analysis

Erasmus MC Cancer Institute, University Medical Center Rotterdam, Department of Hematology, Rotterdam, The Netherlands

Hopital St. Louis, Dept.of Hematology - BMT, Paris, France

Bone Marrow Transplant Unit L 4043, National University Hospital, Rigshospitalet, Copenhagen, Denmark

University Medical Center Groningen (UMCG), Dept. of Hematology, Groningen, The Netherlands

Programme de Transplantation & Therapie Cellulaire, Centre de Recherche en Cancérologie de Marseille, Institut Paoli Calmettes, Marseille, France

Aarhus University Hospital, Aarhus Amtssygehus, Aarhus, Denmark

CHU Bordeaux, Hôpital Haut-leveque, Pessac, France

Cliniques Universitaires St. Luc, Dept. of Haematology, Brussels, Belgium

CHRU Nancy, Vandoeuvre Les Nancy, France

CHU Nantes, Dept. D'Hematologie, Nantes, France

Gustave Roussy Cancer Campus, BMT Service, Department of Hematology, Villejuif, France

Kings College Hospital, Dept. of Haematological Medicine, London, United Kingdom

Oslo University Hospital, Rikshospitalet, Clinic for Cancer Medicine, Hematology Dept., Section for Stem Cell Transplantation, Oslo, Norway

Medical Clinic and Policinic 1, Hematology and Cellular Therapy, University hospital Leipzig, Leipzig, Germany

Centre Hospitalier Universitaire de Rennes, Service d'Hematologie Clinique Adulte, Rennes, France

Nijmegen Medical Centre, Department of Hematology, Nijmegen, The Netherlands

University of Liege, Dept. of Hematology, CHU Sart-Tilman, Liege, Belgium

University Hospital Gasthuisberg, Dept. of Hematology, Leuven, Belgium

CHU Lapeyronie, Département d'Hématologie Clinique, Montpellier, France

University Hospital, Dept. of Bone Marrow Transplantation, Essen, Germany

CHU Nice - Hôpital de l'ARCHET I, Hematologie Clinique, Nice, France

Addenbrookes Hospital, Department of Haematology, Cambridge, United Kingdom

Institute of Hematology and Transfusion Medicine, Warsaw, Poland

Leiden University Hospital, BMT Centre Leiden, Leiden, The Netherlands

Hosp. Reina Sofia, Córdoba Hospital, Department of Hematology, Cordoba, Spain

CHU Grenoble Alpes - Université Grenoble Alpes, Service d'Hématologie, CS 10217, Grenoble, France

Techniciens d'Etude Clinique suivi de patients greffes, Nouvel Hopital Civil, Strasbourg, France University Hospital, Dept. of Medicine, Uppsala, Sweden

University Hospital Maastricht, Dept. Internal Med.Hematology /Oncology, Maastricht, The Netherlands

Hospital Universitario Donostia, San Sebastian, Spain

C.H.R.U de Brest, Service Onco-Hematologie, Brest, France

Southampton General Hospital, Haematology, Oncology, & Paediatrics, Dept. of Haematology, Tremona Road, Southampton, United Kingdom

First State Pavlov Medical University of St. Petersburg, Raisa Gorbacheva Memorial Research Institute for Paediatric Oncology, Hematology, and Transplantation, St Petersburg, Russia

Ghent University Hospital, Haematology, Gent, Belgium

“Tor Vergata” University of Rome, Stem Cell Transplant Unit, Policlinico Universitario Tor Vergata, Rome, Italy

Centre Henri Becquerel, Hematology, Rouen, France

Universitaet Tuebingen, Medizinische Klinik, Tuebingen, Germany

Skanes University Hospital, Dept. of Hematology, Lund, Sweden

CHU - Institut Universitaire du Cancer Toulouse, Oncopole, Toulouse, France

University Hospital, Hematology, Basel, Switzerland

Inst. Português de Oncologia do Porto, BMT Unit, Porto, Portugal

Department of Haematology, University Hospital of Wales, Cardiff, United Kingdom

University of Heidelberg, Medizinische Klinik u. Poliklinik V, Heidelberg, Germany

ASST Papa Giovanni XXIII, Hematology and Bone Marrow Transplant Unit, Bergamo, Italy

University of Muenster, Dept. of Hematology/Oncology, Muenster, Germany

Nottingham University, Hucknall Road, Nottingham, United Kingdom  
Imperial College, Department of Haematology, Hammersmith Hospital, London, United Kingdom  
University Hospital, Clinic of Hematology, Zurich, Switzerland  
CHU de Lille, LIRIC, INSERM U995, Université de Lille, Lille, France  
USD Trapianti di Midollo, Adulti, Università di Brescia, Brescia, Italy  
Institut de Cancerologie Lucien Neuwirth, Service d'Hématologie Clinique, Saint Etienne, France  
University Hospital Center Rebro, Zagreb, Croatia  
VU University Medical Center, Department of Hematology (Br 250), Amsterdam, The Netherlands  
Vilnius University Hospital Santaros Klinikos, Haematology, Oncology & Transfusion Center, Vilnius, Lithuania  
Universitaetsklinikum Dresden, Medizinische Klinik und Poliklinik I, Dresden, Germany  
National Research Center for Hematology, Bone Marrow Transplantation, Moscow, Russia  
CHRU Limoges, Service d'Hématologie Clinique, Limoges, France  
Hopital Jean Minjot, Service d'Hématologie, Besancon, France  
Department of Bone Marrow Transplantation and Oncohematology, Maria Sklodowska-Curie  
National Research Institute of Oncology, Oncology Center, Gliwice, Poland  
Centre Hospitalier Lyon Sud, Pavillon Marcel Bérard -Bat 1G, Service Hematologie, Lyon, France  
Chaim Sheba Medical Center, Chaim Sheba Medical Center, Dept. of Bone Marrow Transplantation, Tel Hashomer,  
Israel  
University of Amiens: CHU Amiens, Service d'Hématologie, Amiens, France  
Hôpital Necker, Service Hematologie Adulte, Paris, France  
CHU CAEN, Institut d'hématologie de Basse-Normandie, Caen, France  
Turku University Hospital, TD7 (Stem Cell Transplant Unit), Turku, Finland  
Ospedale Civile, Dipartimento Oncologico Ematologico, Pescara, Italy  
Hôpital Henri Mondor, Sve d' Hematologie, Creteil, France  
Universite Paris IV, Hopital la Pitié-Salpêtrière, Hematologie Clinique, Paris, France  
University of Cologne, I. Dept. of Medicine, Cologne, Germany  
Dél-pesti Centrumkórház –, Országos Hematológiai és Infektológiai Intézet, Dept. Haematology and Stem Cell  
Transplant, Budapest, Hungary  
Manchester Royal Infirmary, Clinica Haematology Department, Manchester, United Kingdom  
Silesian Medical Academy, Univ. Dept. of Haematology and BMT, Katowice, Poland  
Azienda Ospedaliero Universitaria di Udine, Division of Hematology, Udine, Italy  
Karolinska University Hospital, Dept. of Hematology, Stockholm, Sweden  
Yorkshire Blood & Marrow Transplant Programme, Haematology Department, Level 3, Bexley Wing, St  
James's Institute of Oncology, Leeds, United Kingdom  
Hope Directorate, St. James's Hospital, James Street, Dublin, Ireland  
Hadassah University Hospital, Dept. of Bone Marrow Transplantation, Jerusalem, Israel  
University Hospital Birmingham NHS Trust, Queen Elizabeth Medical Centre, Edgbaston, Dept. of  
Haematology, Birmingham, United Kingdom  
HUCH Comprehensive Cancer Center, Stem Cell Transplantation Unit, Helsinki, Finland  
ICO-Hospital Universitari Germans Trias i Pujol, Cattedra e Servizio di Ematologia, Badalona, Spain  
Hospital Universitario Virgen del Rocío, Servicio de Hematologia y Hemoterapia, Servicio Andaluz de Salud,  
Sevilla, Spain  
Belfast City Hospital, Dept. of Haematology, Belfast, United Kingdom  
Ospedale San Raffaele s.r.l., Haematology and BMT, Milano, Italy  
Hospital Sirio-Libanés, Hematology Bone Marrow Transplant Unit, Sao Paulo, Brazil  
University Hospital Aachen, Dept. of Oncology, Hematology and SCT, Medizinische Klinik IV, Aachen, Germany  
Istituto Clinico Humanitas, Transplantation Unit, Department of Oncology and Haematology, Milano, Italy  
Ospedale Dell' Angelo, Hematology Department, Venezia, Italy  
Universitaetsklinikum Goettingen, Abteilung Hämatologie und Onkologie, Goettingen, Germany  
AZ Delta, Hematology Dept., Roeselare, Belgium  
Hôpital D'instruction des Armées (HIA) PERCY, Service d'Hématologie, Clamart, France  
Institut Catalá d'Oncologia– Hospital Duran i Reynals, L'Hospitalet de Llobregat, Barcelona, Spain

Hopital Saint Antoine, Department of Hematology, Paris, France  
Institut Jules Bordet, Experimental Hematology, Brussels, Belgium  
Bologna University, S.Orsola-Malpighi Hospital, Institute of Hematology & Medical, Oncology L & A Seràgnoli,  
Bologna, Italy  
CHU ESTAING, Service d'hématologie clinique Adulte et pédiatrie, Clermont Ferr, France  
Olomouc University Hospital, Department of Haemato-Oncology, Faculty of Medicine and Dentistry, Olomouc,  
Czech Republic  
Unidad de Ensayos Clínicos de Hematología Pabellón A, bajo., Complejo Hospitalario de Navarra, Pamplona, Spain  
Hospital Vall d'Hebron, Unidad de Adultos, Barcelona, Spain  
Universitair Ziekenhuis Brussel, Division of Clinical Hematology, Brussels, Belgium  
Philipps Universitaet Marburg, University Hospital Giessen and Marburg, Campus Marburg, Baldingerstr.,  
Marburg, Germany  
Hospital Clínico, Servicio de Hematología, Salamanca, Spain  
University Regensburg, Dept. of Hematology and Oncology, Regensburg, Germany  
University Hospitals Plymouth NHS Trust, Derriford Hospital, Plymouth, United Kingdom  
H SS. Antonio e Biagio, Haematology Department, Alessandria, Italy  
Medicana International Hospital Istanbul, Bone Marrow Transplant Unit, Istanbul, Turkey  
Antwerp University Hospital (UZA), Dept. of Hematology, Antwerp Edegem, Belgium  
Tel Aviv Sourasky Medical Center, Blood and Bone Marrow Transplantation, Tel Aviv, Israel  
Hospital Guglielmo da Saliceto, Oncology and Hematology Department, Piacenza, Italy  
Klinik fuer Innere Medizin III, Universitätsklinikum Ulm, Ulm, Germany  
Bone Marrow Transplant Unit, Beatson, West of Scotland Cancer Centre, Gartnavel General Hospital, Glasgow,  
United Kingdom  
Hopital La Miletrie, Head of the Bone Marrow Transplant Unit, Clinical Hematology, Poitiers, France  
Hospital Clínico de Valencia, Servicio de Hematología, Valencia, Spain  
Birmingham Heartlands Hospital, Department of Haematology, Birmingham, United Kingdom  
Hospital Sao Joao, Servicio de Hematologia Clinica, Porto, Portugal  
ZNA, Lange Beeldekensstraat 267, Antwerp, Belgium  
Fundeni Clinical Institute, Bucharest, Romania  
Anadolu Medical Center Hospital, Bone Marrow Transplantation Department, Kocaeli, Turkey  
King Abdul - Aziz Medical City, Riyadh, Saudi Arabia  
A.Z. Sint-Jan, Dept. of Hematology, Brugge, Belgium  
Universitaetsklinikum Jena, Klinik für Innere Medizin II, (Abt. Hämatologie und Onkologie), Am Klinikum 1, Jena,  
Germany  
Azienda Ospedaliero Universitaria di Modena Policlinico, Ematologia, Modena, Italy  
Hospital Ramón y Cajal, Servicio de Hematología, Madrid, Spain  
Klinikum Nuernberg, 5. Medizinische Klinik, BMT-Unit, Nuernberg, Germany  
Leicester Royal Infirmary, Department of Haematology, NHS Trust, Leicester, United Kingdom  
Hospital Morales Meseguer, C/ Marqués de los Velez s/n, Unidad de Trasplante de Médula Osea, Serv de Hemat,  
Murcia, Spain  
Sheffield Teaching Hospitals NHS Trust, Royal Hallamshire Hospital, Sheffield, United Kingdom  
Christie NHS Trust Hospital, Adult Leukaemia and Bone Marrow Transplant Unit, Manchester, United  
Kingdom  
Medizinische Klinik m. S. Hämatologie , Onkologie und Tumorimmunologie, Charité  
Universitätsmedizin Berlin, Berlin, Germany  
Hospital Gregorio Marañón, Sección de Trasplante de Medula Osea, Madrid, Spain  
ZSIS Universitaetsklinikum Knappschaftskrankenhaus Bochum GmbH, Medizinische Klinik - Hämatologie und  
Onkologie, Bochum, Germany  
Haukeland University Hospital, Department of Haematology, Bergen, Norway  
Hospital Clinic, Institute of Hematology & Oncology, Dept. of Hematology, Barcelona, Spain  
Royal Marsden Hospital, Leukaemia Myeloma Units, London, United Kingdom

S.S.C.V.D Trapianto di Cellule Staminali, A.O.U Citta della Salute e della Scienza di Torino, Presidio Molinette, Torino, Italy

Univ. La Sapienza, Dip. Biotecnologie Cellulari ed Ematologia, Rome, Italy

University Medical Center Schleswig-Holstein, Campus Kiel, División of Stem Cell Transplantation and Immunotherapy, Kiel, Germany

Hospital Santa Creu i Sant Pau, Hematology Department, Barcelona, Spain

Département d'Oncologie, Service d'Hématologie, Hôpitaux Universitaires De Genève, Geneva, Switzerland

Sahlgrenska University Hospital, Center for Hematopoietic Cell Transplantation, Hematology Section, Goeteborg, Sweden

Inst. Portugues Oncologia, BMT Unit, R. Prof. Lima Basto, Lisboa, Portugal

Universita Cattolica S. Cuore, Istituto di Ematologia, Ematologia, Rome, Italy

LKH - University Hospital Graz, LKH - University Hospital Graz, Division of Haematology, Graz, Austria

Fundación Jiménez Díaz, Hematología, Madrid, Spain

Complejo Hospitalario de A Coruña, Hematología (Planta 11ª), La Coruna, Spain

U.O.D Trapianti di midollo osseo, A.O.R Villa Sofia-Cervello, Palermo, Italy

Clatterbridge Cancer Centre - Liverpool, Royal Liverpool University Hospital, Clatterbridge Cancer Centre NHS Foundation Trust, Division of Stem Cell Transplantation and Haemato-, Liverpool, United Kingdom

IRCCS, Casa Sollievo della Sofferenza, Department of Hemato-Oncology, Stem Cell Transplant Unit, S Giovanni Rot, Italy

Department of Hematology and Transplantology of Lower Silesian Oncology, DCTK, Marrow Donor Registry, Wroclaw, Poland

Hospital Univ. Virgen de las Nieves, Servicio de Hematología, Granada, Spain

Klinik fuer Knochenmarktransplantation, und Hämatologie/Onkologie GmbH, Idar Oberstein, Germany

Az. Ospedaliera S. Croce e Carle, Division of Hematology, Cuneo, Italy

U.O. Ematologia con Trapianto, Azienda Ospedaliero Universitaria Policlinico Bari, Bari, Italy

Institute of Hematology and Blood Transfusion, Servicio de Hematología, Prague, Czech Republic

University Hospital La Fe, Hematology Department (Torre F, Planta 7), Valencia, Spain

Clinica Puerta de Hierro, Servicio de Hematología y Hemoterapia, Madrid, Spain

Centro Trapianti Unico Di CSE Adulti e Pediatrico A. O Brotzu, Via Edward Jenner, 1, P.O. R. Binaghi, Cagliari, Italy

King Faisal Specialist Hospital and Research Center, Department of Oncology, Jeddah, Saudi Arabia

Medstar Antalya Hospital, Stem Cell Transplantation Unit, Antalya, Turkey

Unita Operativa di Ematologia e Trapianto di cellule staminali, Presidio Ospedaliero Vito Fazzi, Lecce, Italy

St. Franziskus Hospital, Medizinische Klinik I, Flensburg, Germany

Fondazione IRCCS Policlinico San Matteo, Pavia, Italy

Mazzoni Hospital, Haematology Service, Ascoli Piceno, Italy

Robert\_Bosch\_Krankenhaus, Abt. Hämatologie / Onkologie, Stuttgart, Germany

Klinikum Augsburg, II Medizinische Klinik, Augsburg, Germany

Gazi University Faculty of Medicine, Hematology, Besevler, Ankara, Turkey

University Hospital Bern, Paediatric Hematology/Oncology, Insel Gruppe AG, Kreditorenbuchhaltung, Bern, Switzerland

Medizinische Universitaet Wien, Klinik fuer Innere Medizin I, Knochenmarktransplantation, Vienna, Austria

University Medical Centre, Dept. of Haematology, Utrecht, The Netherlands

Hospital U. Marqués de Valdecilla, Servicio de Hematología-Hemoterapia, c/ Marqués de Valdecilla s/n, Santander, Spain

Department of Haematology, Cancer and Haematology Centre, Churchill Hospital, Oxford, United Kingdom

The Trustee of London Clinic, Stem Cell Transplant Unit, London, United Kingdom

Fondazione IRCCS - Ca' Granda, Ospedale Maggiore Policlinico IRCCS, Milano, Italy

Spedali Civili - Brescia, Hematology Division, Department of Medical Oncology, Brescia, Italy

Hannover Medical School, Department of Haematology, Hemostasis, Oncology, and Stem Cell Transplantation, Hannover, Germany

Onco-Ematologia Pediatrica, Centro Trapianti Cellule Staminali, Ospedale Infantile Regina Margherita, Torino, Italy  
Deutsche Klinik fuer Diagnostik, KMT Zentrum, Wiesbaden, Germany  
European Institute of Oncology, Institute of Haematology, Milano, Italy  
University Children`s Hospital, THE HOSPITAL OF THE ELEONORE FOUNDATION, Division of Stem Cell Transplantation, Zurich, Switzerland  
Martin-Luther-Universitaet Halle-Wittenberg, Klinik für Innere Medizin IV, Halle, Germany  
University Hospital &quot;Queen Johanna-Isul&quot;, Sofia, Bulgaria  
University Medical Center Schleswig-Holstein, Clinic for Hematology/Oncology and Stem cell transplantation, Luebeck, Germany  
Department of Internal Medicine, American University of Beirut Medical Center, Beirut, Lebanon  
Gaziantep University Medical School, Division of Haematology, Kilis Yolu, Gaziantep, Turkey  
Centre Hospitalier Sud Réunion, Service de médecine G, Hématologie-Oncologie`, Saint Pierre, France  
Unità Operativa Di Medicina Interna, Civitanove Marche, Civitanove Mar, Italy  
Arab Medical Center, Amman, Jordan  
Ospedale San Gerardo, Clinica Ematologica dell`Universita Milano-Biocca, Monza, Italy  
George Papanicolaou General Hospital, Haematology Department / BMT Unit, Thessaloniki, Greece  
Hospital Clinico Universitario, Servicio de Hematología, C/ Galeras s/n, S de Compostela, Spain  
King Hussein Cancer Centre, Queen Rania Street - Aljubiha, Amman, Jordan  
Universitaet Rostock, Kl. für Inn.Med./Hämatologie/Onkol., Rostock, Germany  
Grande Ospedale Metropolitano Bianchi Melacrino Morelli - Centro Unico Trapianti A. Neri, Alberto Neri, Bianchi-Melacrino-Morelli, Reggio Calabria, Italy  
University Hospital Brno, Dept. of Internal Med. - Hematooncology, Brno, Czech Republic  
University Hospital Eppendorf, Bone Marrow Transplantation Centre, Hamburg, Germany  
CHRU, Service des Maladies du Sang, Angers, France  
Arcispedale S. Maria Nuova, Unita Operativa Ematologia, Reggio Emilia, Italy  
Ospedale La Maddalena - Dpt. Oncologico, Unità Operativa di Oncoematologia e, Trapianto di Midollo, Palermo, Italy  
Charles University Hospital, Dept. of Hematology/Oncology, Pilsen, Czech Republic  
Fundació Institut d`Investigació Sanitària Illes Balears – IdISBa, Hospital Universitari Son Espases, Palma Mallorca, Spain  
Umea University Hospital, Hematology, Umea, Sweden  
Clínica Universitaria de Navarra, Area de Terapia Celular, Unidad de Trasplante Hemopoyético, Pamplona, Spain  
University Hospital, Dept. of Hematology, Linköping, Sweden  
Tartu University Hospital, Clinic of Hematology and Oncology, Tartu, Estonia  
Klinikum Oldenburg, Abt. Onkologie/Hämatologie, Oldenburg, Germany  
Centre Hospitalier Universitaire Vaudois, Centre Hospitalier Universitaire Vaudois, División of Hematology, Lausanne, Switzerland  
Private Medicana International Ankara Hospital, Dept. Bone Marrow Transplantation, Ankara, Turkey  
Central Clinical Hospital, Medical University of Warsaw, Department of Hematology & Oncol, Ul. Banacha 1a, Warsaw, Poland  
University Hospital of Oran, Department of Haematology and Cell Therapy, USTO, Oran, Algeria  
Demiroglu Bilim University Istanbul Florence Nightingale Hospital, Hematopoietic SCT Unit, Istanbul, Turkey

**Table S1: Points accorded for individual component of the TCI score table adapted from Spyronidis et al, Blood Advances 2020.** Scores are assigned additively for each component included in the conditioning regimen.

| <b>Component</b>                 | <b>Dose</b>     | <b>Number of points</b> |
|----------------------------------|-----------------|-------------------------|
| TBI (Gray)                       | ≤ 5             | 1                       |
|                                  | 6-8             | 2                       |
|                                  | ≥ 9             | 3                       |
| Busulfan (mg/kg)                 | ≤ 6.4 IV/≤ 8 PO | 1                       |
|                                  | 9.6 IV/12 PO    | 2                       |
|                                  | 12.8 IV/16 PO   | 3                       |
| Treosulfan (g/m <sup>2</sup> )   | 30              | 1                       |
|                                  | 36              | 2                       |
|                                  | 42              | 3                       |
| Melphalan (mg/m <sup>2</sup> )   | < 140           | 1                       |
|                                  | 140-199         | 2                       |
|                                  | ≥ 200           | 3                       |
| Thiotepa (mg/kg)                 | < 10            | 0.5                     |
|                                  | 10-19           | 1                       |
|                                  | ≥ 20            | 1.5                     |
| Fludarabine (mg/m <sup>2</sup> ) | ≤ 160           | 0.5                     |
|                                  | > 160           | 1                       |
| Cyclophosphamide (mg/kg)         | < 90            | 0.5                     |
|                                  | ≥ 90            | 1                       |

**Table S2. Regimens and doses of the included patients.**

| <b>Regimen</b>     |             | <b>Component (dose unit)</b>    | <b>Dose<br/>(median [IQR] where varied)</b> |
|--------------------|-------------|---------------------------------|---------------------------------------------|
| <i>Flu+Bu</i>      | 1,129 (68%) | Fludarabine (g/m <sup>2</sup> ) | 150                                         |
|                    |             | Busulfan IV (mg/kg)             | 6.4                                         |
|                    |             | Busulfan PO (mg/kg)             | 8                                           |
| <i>Bu+Cy</i>       | 20 (1%)     | Busulfan IV (mg/kg)             | 3.2 [3.2-6.4]                               |
|                    |             | Busulfan PO (mg/kg)             | 6.4                                         |
|                    |             | Cyclophosphamide (mg/kg)        | 150                                         |
| <i>Flu+Mel</i>     | 27 (2%)     | Fludarabine (g/m <sup>2</sup> ) | 150 [135-150]                               |
|                    |             | Melphalan (mg/m <sup>2</sup> )  | 110                                         |
| <i>Flu+TBI</i>     | 364 (22%)   | Fludarabine (g/m <sup>2</sup> ) | 150                                         |
|                    |             | Total body irradiation (cGy)    | 200                                         |
| <i>Flu+Treo</i>    | 65 (4%)     | Fludarabine (g/m <sup>2</sup> ) | 150                                         |
|                    |             | Treosulfan (g/m <sup>2</sup> )  | 30                                          |
| <i>Flu+Bu+Thio</i> | 58 (3%)     | Fludarabine (g/m <sup>2</sup> ) | 150                                         |
|                    |             | Busulfan IV (mg/kg, no PO)      | 6.4                                         |
|                    |             | Thiotepa (mg/kg)                | 5                                           |

Patients described in Figure 2 (comparing comorbidity by TCI intensity level) included those who received these regimens at intermediate and high doses as per the TCI definitions (Spyridonitis 2020) as well as patients who received conditioning with cyclophosphamide + total body irradiation. Abbreviations: Flu: fludarabine; Bu: busulfan; Cy: cyclophosphamide; Mel: melphalan; TBI: total body irradiation; Treo: treosulfan; Thio: thiotepa.

**Table S3: Comorbidity definitions.** *Composite cardiac disease* was defined as the presence of HCT-CI-defined cardiac disease, arrhythmia, or heart valve disease.

| <b>Comorbidity</b>                | <b>HCT-CI Definition</b>                                                                                                                                    |
|-----------------------------------|-------------------------------------------------------------------------------------------------------------------------------------------------------------|
| <b>Arrhythmia</b>                 | Atrial fibrillation or flutter, sick sinus syndrome, or ventricular arrhythmias                                                                             |
| <b>Cardiac</b>                    | Coronary artery disease, congestive heart failure, history of myocardial infarction, or left ventricular ejection fraction $\leq 50\%$                      |
| <b>Heart valve disease</b>        | Except mitral valve prolapse                                                                                                                                |
| <b>Diabetes Mellitus</b>          | Diabetes Mellitus requiring treatment with insulin or hypoglycemic agents at the time of initiation of conditioning                                         |
| <b>Mild Hepatic</b>               | Serum bilirubin between ULN and 1.5 times ULN; ALT or AST between ULN and 2.5 times ULN, or chronic hepatitis                                               |
| <b>Moderate/Severe Hepatic</b>    | Serum bilirubin greater than 1.5 times ULN; ALT or AST greater than 2.5 times ULN, or chronic hepatitis                                                     |
| <b>Infection</b>                  | Infection requiring antimicrobial therapy continuing after the date of transplantation (day 0)                                                              |
| <b>Obesity</b>                    | Body mass index $\geq 35$ kg/m <sup>2</sup>                                                                                                                 |
| <b>Psychiatric</b>                | Depression or anxiety which requires treatment at the time of transplantation                                                                               |
| <b>Moderate Pulmonary</b>         | DLC <sub>o</sub> <sup>a</sup> or FEV <sub>1</sub> 66-80% or dyspnea on slight activity                                                                      |
| <b>Severe Pulmonary</b>           | DLC <sub>o</sub> <sup>a</sup> or FEV <sub>1</sub> $< 66$ or dyspnea at rest/oxygen dependent                                                                |
| <b>Moderate/severe renal</b>      | Serum creatinine $> 2$ mg/dL, on dialysis, or prior renal transplantation                                                                                   |
| <b>Cerebrovascular disease</b>    | Transient ischemic attack or cerebrovascular accident                                                                                                       |
| <b>Rheumatologic</b>              | SLE, RA, polymyositis, mixed CTD, or polymyalgia rheumatica                                                                                                 |
| <b>Prior malignancy</b>           | Malignancy unrelated to the indication for transplantation which has been treated at any point in the patient's history, excluding non-melanoma skin cancer |
| <b>Peptic ulcer</b>               | Requiring treatment                                                                                                                                         |
| <b>Inflammatory bowel disease</b> | Crohn disease or ulcerative colitis                                                                                                                         |

ULN – upper limit of normal; ALT – alanine aminotransferase; AST – aspartate aminotransferase; DLC<sub>o</sub> – diffusion capacity of the lung for carbon monoxide; FEV<sub>1</sub> – forced expiratory volume in one second; SLE – systemic lupus erythmatosis; RA – rheumatoid arthritis; CTD – connective tissue disease



**Table S4: Population characteristics across TCI groups**

| <b>Characteristic</b>               | <b>Overall<br/>(4,836)</b> | <b>TCI low<br/>(1,663)</b> | <b>TCI int<br/>(2,057)</b> | <b>TCI high<br/>(1,116)</b> |
|-------------------------------------|----------------------------|----------------------------|----------------------------|-----------------------------|
| <b>Age (years)</b>                  | 54 [44, 62]                | 61 [55, 66]                | 54 [45, 61]                | 41 [31, 49]                 |
| <b>KPS</b>                          |                            |                            |                            |                             |
| ≥ 90                                | 3,762 (78%)                | 1,150 (69%)                | 1,664 (81%)                | 948 (85%)                   |
| < 90                                | 1,074 (22%)                | 513 (31%)                  | 393 (19%)                  | 168 (15%)                   |
| <b>DRSS</b>                         |                            |                            |                            |                             |
| <u>Low</u>                          | 1,848 (38%)                | 665 (40%)                  | 741 (36%)                  | 442 (40%)                   |
| <u>Int-1</u>                        | 909 (19%)                  | 332 (20%)                  | 388 (19%)                  | 189 (17%)                   |
| <u>Int-2/High</u>                   | 2,079 (43%)                | 666 (40%)                  | 928 (45%)                  | 485 (44%)                   |
| <b>Cytogenetic risk<sup>2</sup></b> |                            |                            |                            |                             |
| Favorable                           | 203 (4%)                   | 48 (3%)                    | 87 (4%)                    | 68 (6%)                     |
| Intermediate                        | 2,730 (56%)                | 1,003 (60%)                | 1,119 (54%)                | 608 (54%)                   |
| Poor                                | 938 (19%)                  | 314 (19%)                  | 423 (21%)                  | 201 (18%)                   |
| Unknown                             | 965 (20%)                  | 298 (18%)                  | 428 (21%)                  | 293 (21%)                   |
| <b>Ontology</b>                     |                            |                            |                            |                             |
| Primary/NOS                         | 4,598 (95%)                | 1,583 (95%)                | 1,947 (95%)                | 1,068 (96%)                 |
| Secondary                           | 238 (5%)                   | 80 (5%)                    | 110 (5%)                   | 48 (4%)                     |
| <b>Donor</b>                        |                            |                            |                            |                             |
| MSD                                 | 4,598 (52%)                | 744 (45%)                  | 1,088 (53%)                | 700 (63%)                   |
| MUD                                 | 2,304 (48%)                | 919 (55%)                  | 969 (47%)                  | 416 (37%)                   |
| <b>Sex match</b>                    |                            |                            |                            |                             |
| Other                               | 3,955 (82%)                | 1,367 (82%)                | 1,661 (81%)                | 927 (83%)                   |
| Female-to-male                      | 881(18%)                   | 296 (18%)                  | 396 (19%)                  | 189 (17%)                   |
| <b>CMV serostatus</b>               |                            |                            |                            |                             |
| D-/R-                               | 989 (20%)                  | 371 (22%)                  | 380 (18%)                  | 238 (21%)                   |
| D-/R+                               | 1,073 (22%)                | 411 (25%)                  | 446 (22%)                  | 216 (19%)                   |
| D+/R-                               | 413 (9%)                   | 162 (10%)                  | 150 (7%)                   | 101 (9%)                    |
| D+/R+                               | 2,361 (49%)                | 719 (43%)                  | 1,081 (53%)                | 561 (50%)                   |
| <b>Regimen</b>                      |                            |                            |                            |                             |
| Flu+Bu                              | 2,231 (46%)                | 1,129 (68%)                | 1,023 (50%)                | 79 (7%)                     |
| Bu+Cy                               | 843 (17%)                  | 20 (1%)                    | 53 (3%)                    | 770 (69%)                   |
| Flu+Mel                             | 469 (10%)                  | 27 (2%)                    | 442 (21%)                  | 0 (0%)                      |
| Flu+TBI                             | 449 (9%)                   | 364 (22%)                  | 82 (4%)                    | 3 (0%)                      |
| Flu+Treo                            | 336 (7%)                   | 65 (4%)                    | 271 (13%)                  | 0 (0%)                      |
| Cy+TBI                              | 258 (5%)                   | 0 (0%)                     | 8 (0%)                     | 250 (22%)                   |
| Flu+Bu+Thio                         | 250 (5%)                   | 58 (3%)                    | 178 (9%)                   | 14 (1%)                     |

**Table S5: Multivariable regression for presence of any versus no significant comorbidity** including the 5 comorbidities identified in the model presented in Table 4: pre-existing malignancy, composite cardiac comorbidity, psychiatric disease, renal disease, or inflammatory bowel disease

| Variable                                      | Non-relapse mortality |         | Relapse           |         | Overall survival  |         |
|-----------------------------------------------|-----------------------|---------|-------------------|---------|-------------------|---------|
|                                               | HR (95% CI)           | p-value | HR (95% CI)       | p-value | HR (95% CI)       | p-value |
| Presence of any of the included comorbidities | 1.74 (1.34, 2.26)     | < 0.001 | 1.22 (1.01, 1.47) | 0.042   | 1.47 (1.24, 1.73) | < 0.001 |
| Age (by year)                                 | 1.05 (1.03, 1.07)     | < 0.001 | 1.00 (0.99, 1.01) | 0.68    | 1.02 (1.01, 1.03) | < 0.001 |
| Karnofsky                                     |                       |         |                   |         |                   |         |
| ≥ 90                                          |                       |         | <i>reference</i>  |         |                   |         |
| < 90                                          | 0.88 (0.67, 1.15)     | 0.34    | 1.00 (0.83, 1.22) | 0.97    | 0.89 (0.75, 1.06) | 0.20    |
| Disease risk (DRSS)                           |                       |         |                   |         |                   |         |
| Low                                           |                       |         | <i>Reference</i>  |         |                   |         |
| Int-1                                         | 1.03 (0.73, 1.46)     | 0.86    | 1.35 (1.04, 1.76) | 0.024   | 1.27 (1.01, 1.59) | 0.043   |
| Int-2/high                                    | 1.10 (0.82, 1.48)     | 0.51    | 1.91 (1.56, 2.35) | < 0.001 | 1.62 (1.35, 1.95) | < 0.001 |
| Donor                                         |                       |         |                   |         |                   |         |
| MSD                                           |                       |         | <i>Reference</i>  |         |                   |         |
| MUD                                           | 1.23 (0.92, 1.63)     | 0.16    | 0.83 (0.69, 1.00) | 0.052   | 1.01 (0.86, 1.20) | 0.87    |
| Female-to-male                                | 1.97 (1.46, 2.68)     | < 0.001 | 0.9 (0.72, 1.17)  | 0.49    | 1.24 (1.01, 1.52) | 0.041   |
| CMV                                           |                       |         |                   |         |                   |         |
| D-/R-                                         |                       |         | <i>Reference</i>  |         |                   |         |
| D-/R+                                         | 1.46 (1.00, 21.2)     | 0.051   | 1.00 (0.78, 1.29) | > 0.99  | 1.14 (0.91, 1.42) | 0.27    |
| D+/R-                                         | 1.04 (0.61, 1.75)     | 0.89    | 0.93 (0.66, 1.32) | 0.70    | 0.95 (0.69, 1.30) | 0.74    |
| D+/R+                                         | 1.17 (0.82, 1.67)     | 0.39    | 0.91 (0.72, 1.14) | 0.42    | 0.97 (0.79, 1.20) | 0.79    |

**Figure S1: Causes of non-relapse mortality**

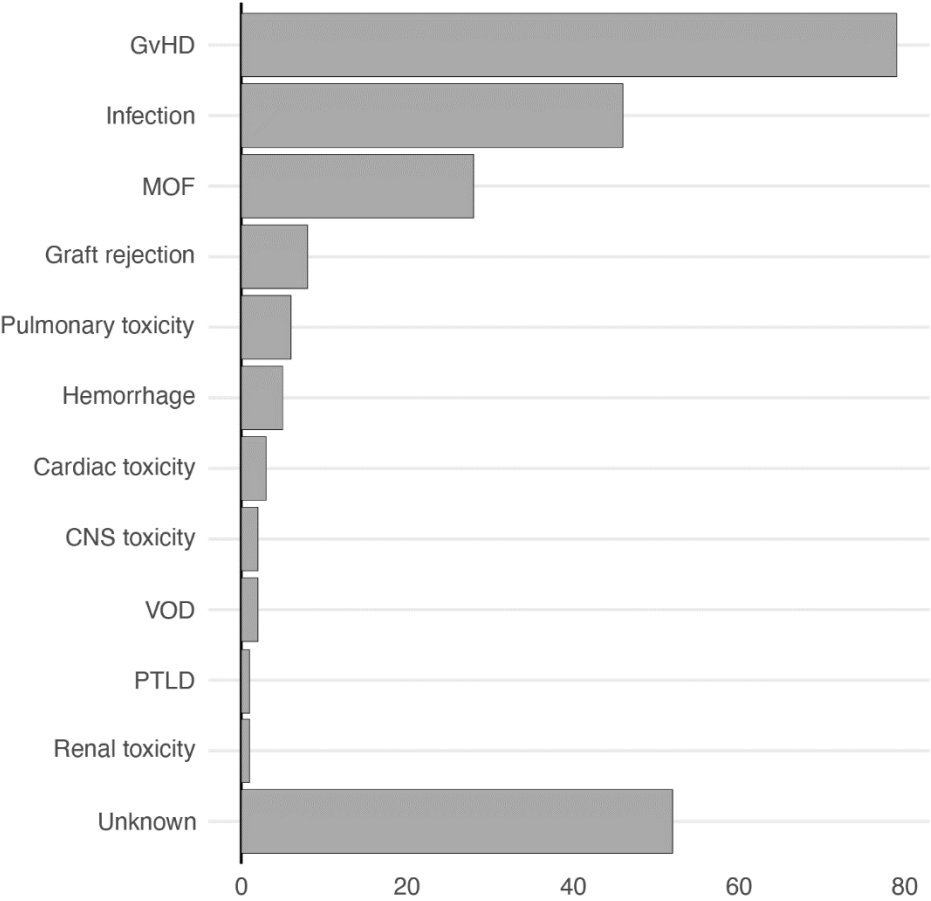

GvHD – graft versus host disease; MOF – multi-organ failure; CNS – central nervous system; VOD – veno-occlusive disease; PTLD – post-transplant lymphoproliferative disorder
